# Supplementary material for: Application of Phytogenic Liquid Supplementation in Soil Microbiome Restoration in Queensland Pasture Dieback
Source: MDPI journal article supplement (doi:10.3390/microorganisms11030561), 2023-02-23
Supplement: s1 [file s1]

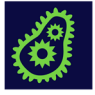

---

*Supplementary Material*

# **Application of phytogenic liquid supplementation on soil microbiome restoration in Queensland pasture dieback**

## **Supplementary Material**

Xipeng Ren<sup>1</sup>, Maria M. Whitton<sup>1</sup>, Sung J. Yu<sup>1</sup>, Tienneke Trotter<sup>1</sup>, Yadav S. Bajagai<sup>1</sup> and Dragana Stanley<sup>1,\*</sup>

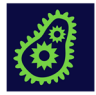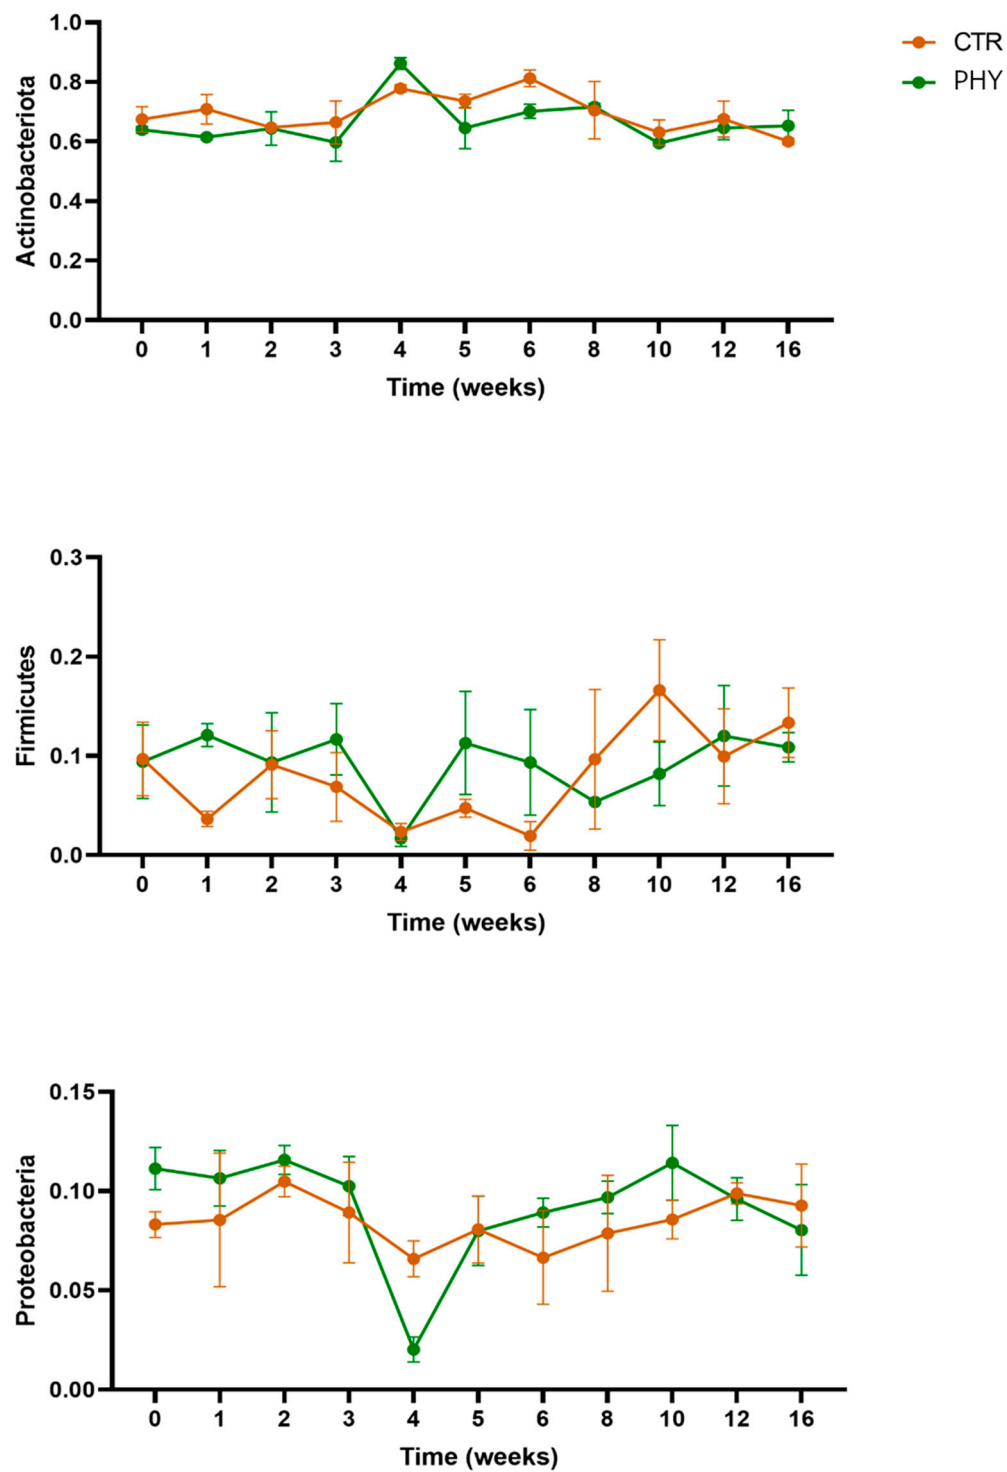

Figure S1. Temporal distribution of phyla

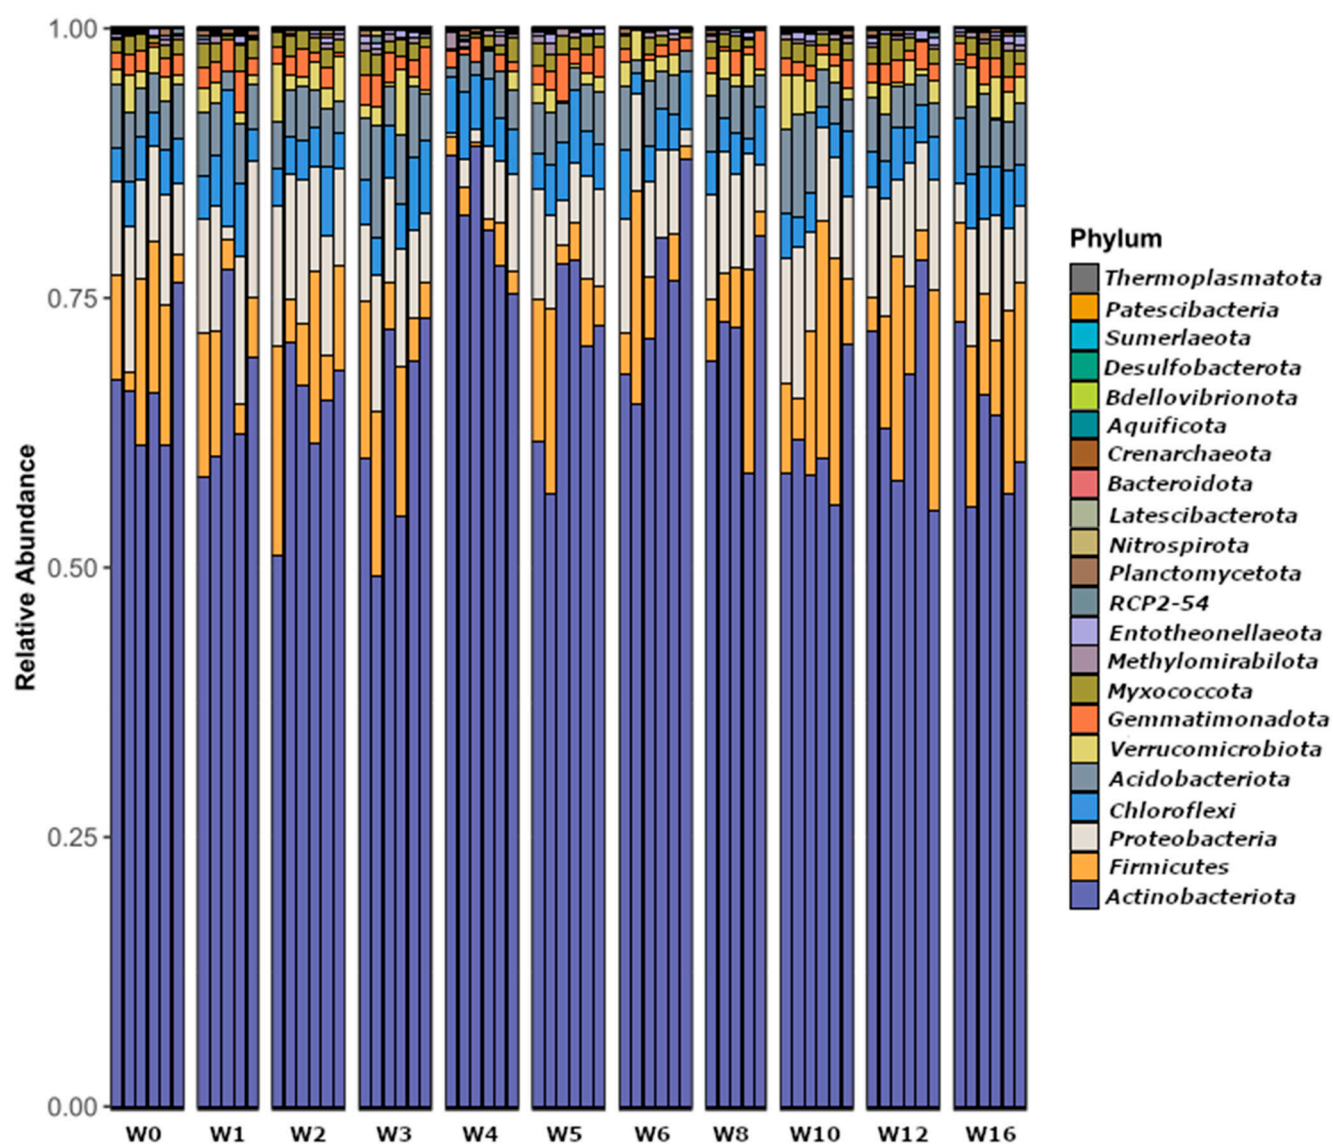

**Figure S2.** Relative abundance at phylum level

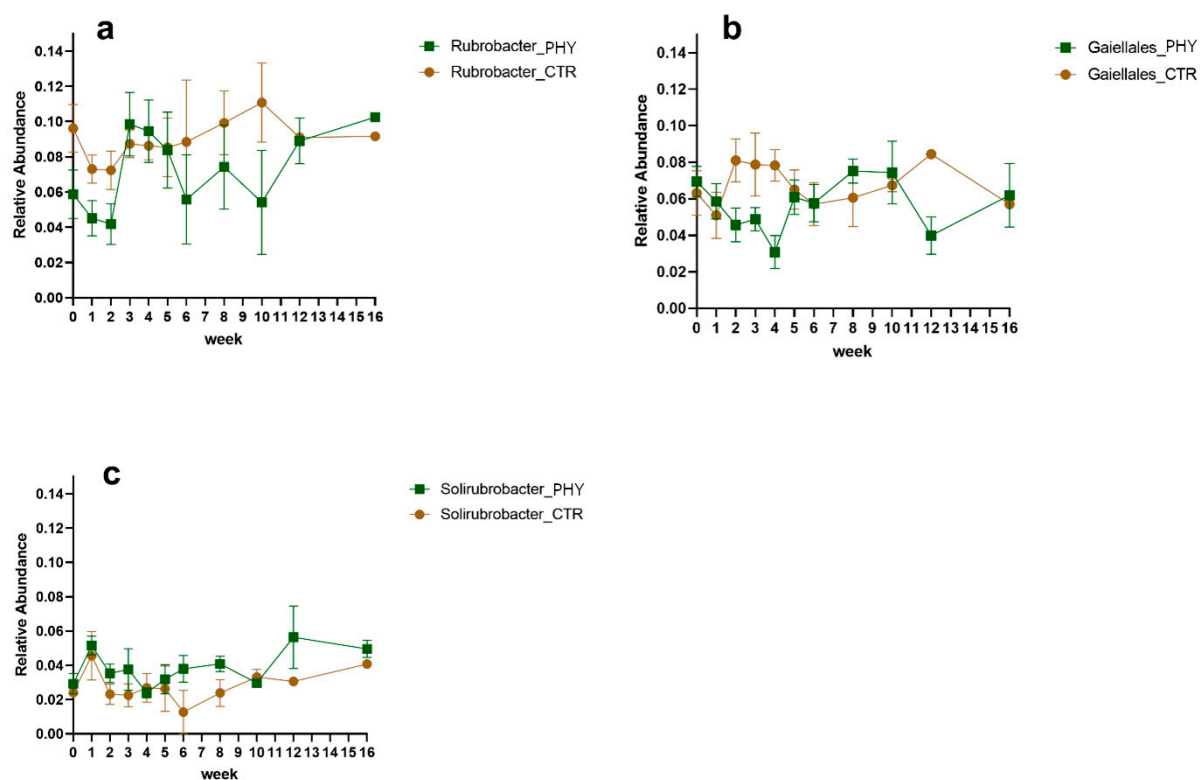

Figure S3. Relative abundance of biomarkers.

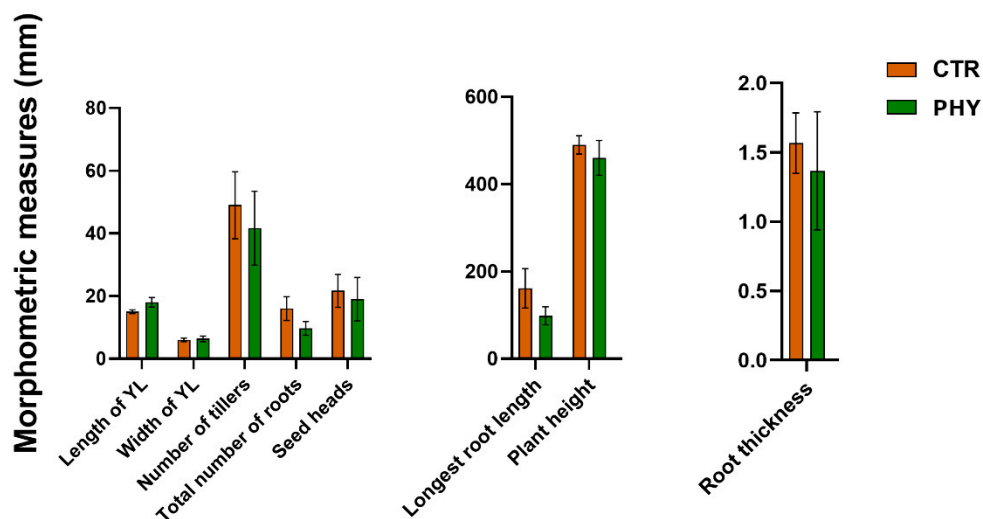

Figure S4. Morphometric measurements in dicots six months after treatment.

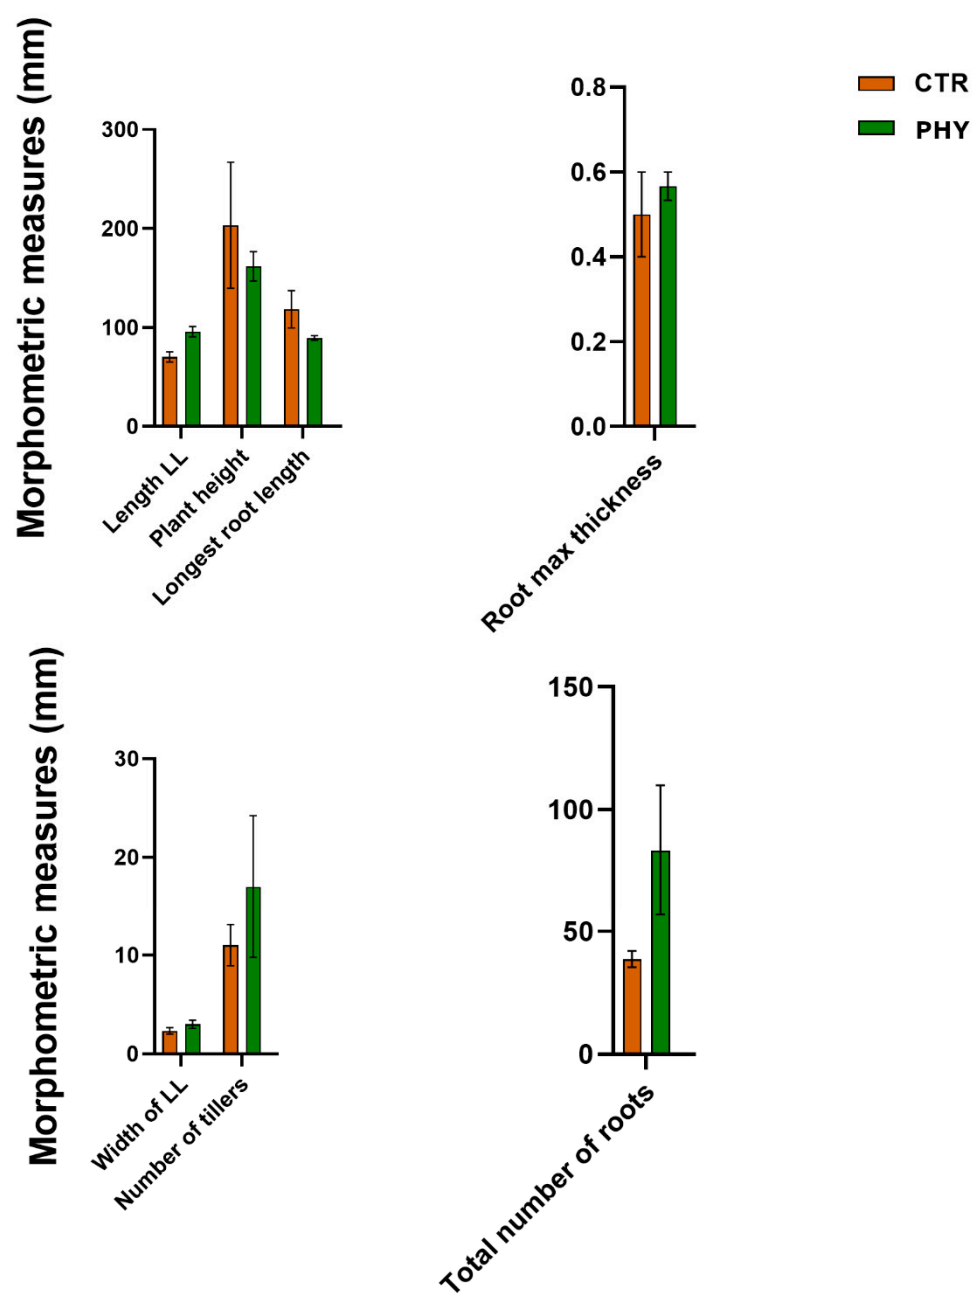

Figure S5. Morphometric measurements in monocot six months after treatment.

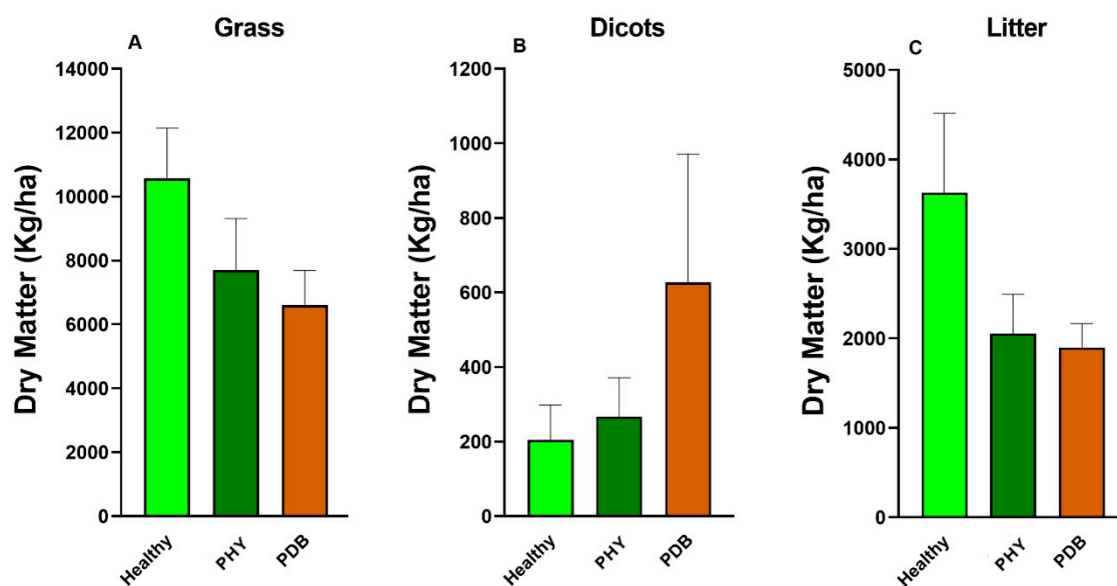

**Figure S6.** Dry matter differences between healthy, phytogenic liquid treated and control plots. Data from the second trial.

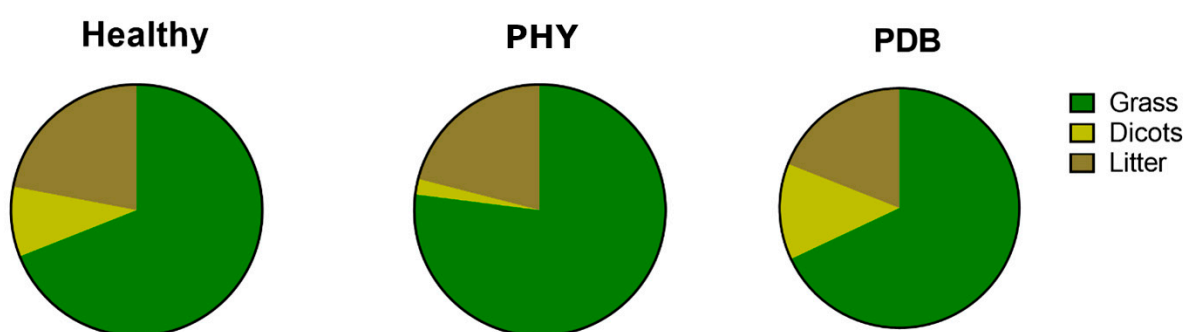

**Figure S7.** Grass/dicots ratio among healthy, phytogenic liquid treated and pasture dieback plots. Data from the second trial.
